# Supplementary material for: Contributions of the N‐terminal intrinsically disordered region of the severe acute respiratory syndrome coronavirus 2 nucleocapsid protein to RNA‐induced phase separation
Source: PubMed Central journal article supplement — Protein Sci. 2022 Aug 18;31(9):e4409. doi: 10.1002/pro.4409 (PMC9387207; doi:10.1002/pro.4409), 2022-08-18
Supplement: PRO-31-e4409-s001.pdf [file PRO-31-e4409-s001.pdf]

## Supplementary Material

**Title:** Contributions of the N-terminal intrinsically disordered region of the SARS-CoV-2 nucleocapsid protein to RNA-associated phase separation

**Authors:** Milan Zachrdla<sup>[1,\*]</sup>, Adriana Savastano<sup>[1,\*]</sup>, Alain Ibáñez de Opakua<sup>[1,\*]</sup>, Maria-Sol Cima-Omori<sup>[1]</sup> and Markus Zweckstetter<sup>[1,2]</sup>

**Corresponding author:** Prof. Dr., M., Zweckstetter

German Center for Neurodegenerative Diseases (DZNE)

Von-Siebold Straße 3a, 37075 Göttingen, Germany

Markus.Zweckstetter@dzne.de

[1] German Center for Neurodegenerative Diseases (DZNE)

Von-Siebold Straße 3a, 37075 Göttingen, Germany

[2] Max Planck Institute for Multidisciplinary Sciences

Am Faßberg 11, 37077 Göttingen, Germany

\* These authors contributed equally.

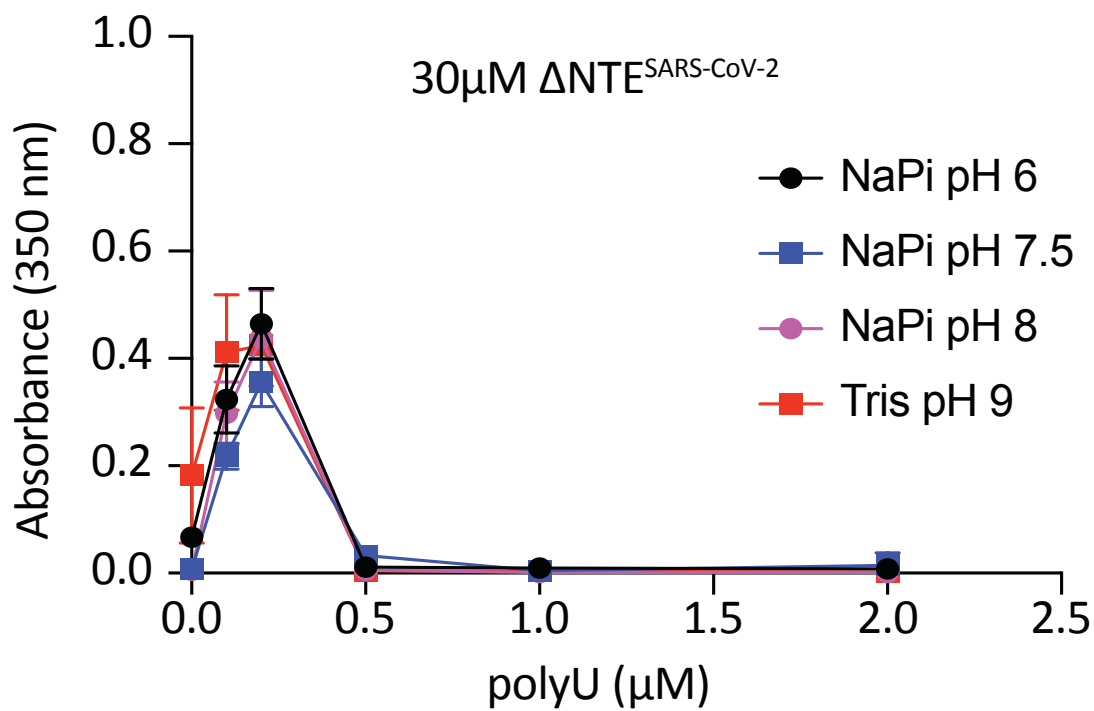

**Figure S1.** Absorbance at 350 nm of 30 μM ΔNTE<sup>SARS-CoV-2</sup> without or with 0.1, 0.2, 0.5, 1, 2 μM polyU RNA in 20 mM sodium phosphate buffer at the pH values 6 (black), 7.5 (blue), and 8 (pink) and in 20 mM Tris buffer at pH 9 (red).

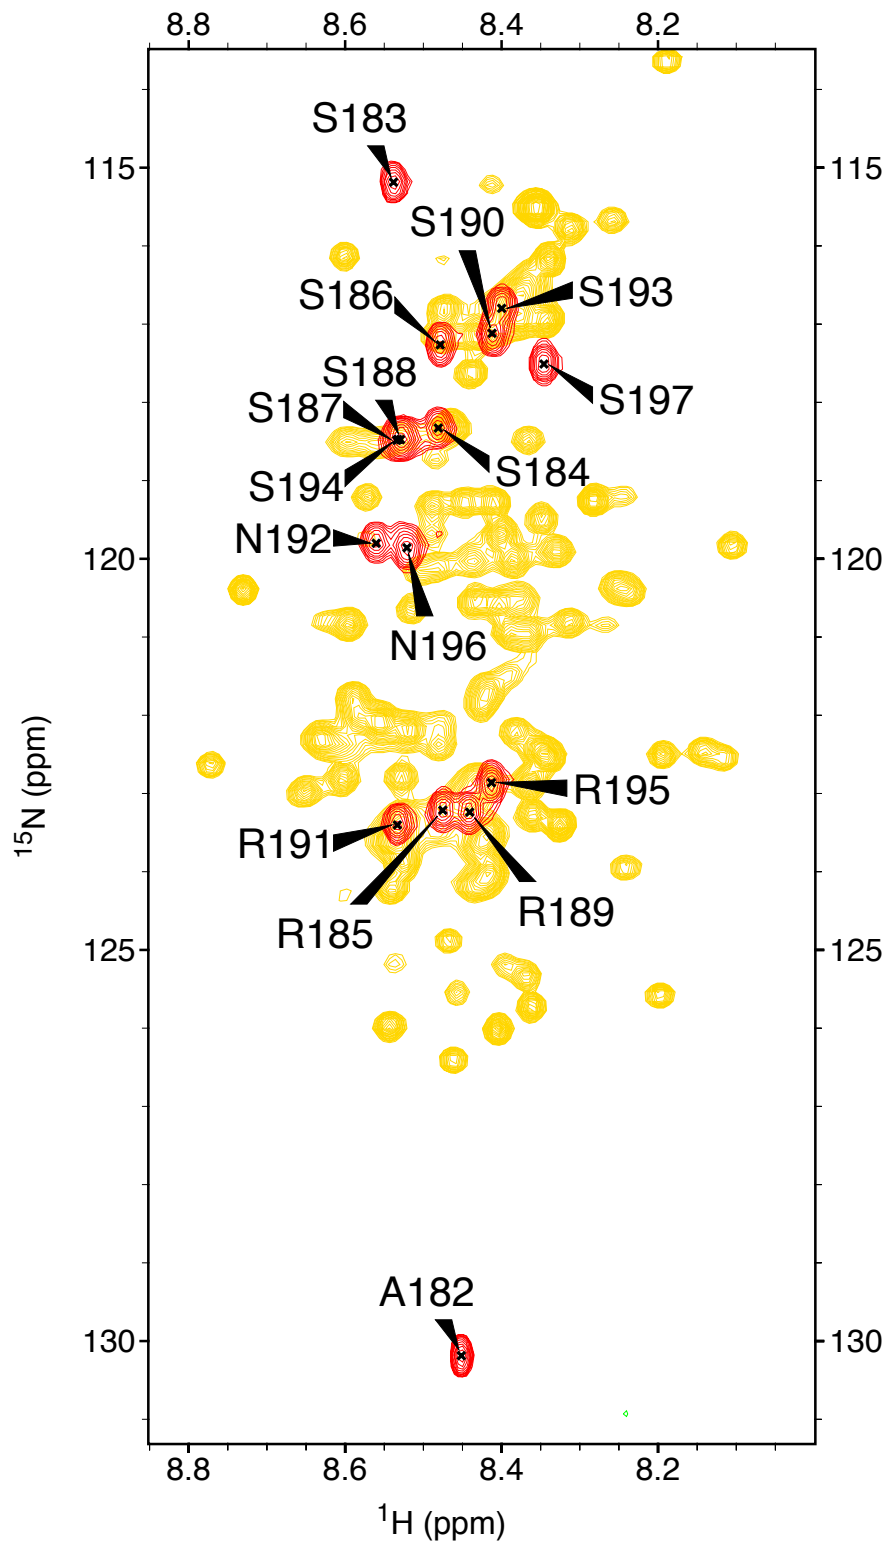

**Figure S2.** Superposition of  $^1\text{H}$ - $^{15}\text{N}$  HSQC spectra of full-length N<sup>SARS-CoV-2</sup> in yellow and the SR region of N<sup>SARS-CoV-2</sup> in red measured at 5 °C with amino-acid assignments.

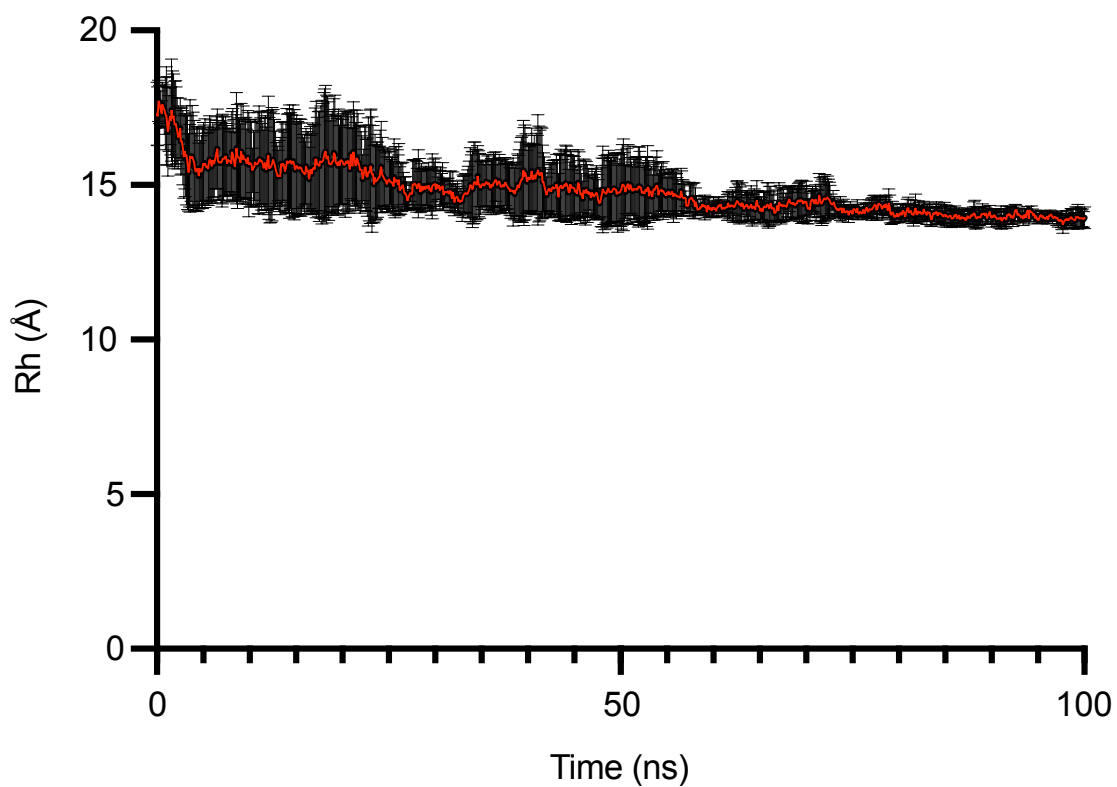

**Figure S3.** Hydrodynamic radius (Rh) of the NTE measured by 100 ns long molecular dynamics simulations for residues 1-50. An average value of Rh from 5 independent simulations and the standard deviation is represented by red line and black error bars, respectively.

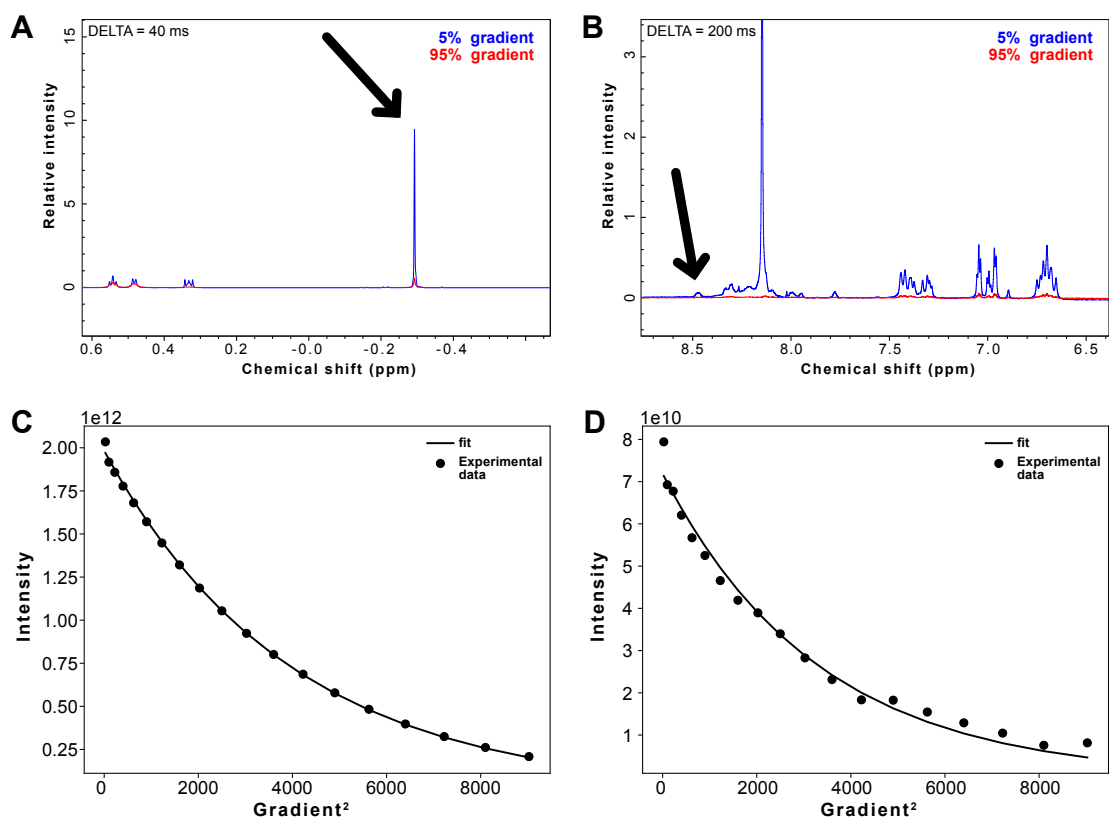

**Figure S4.** NMR diffusion of the NTE using pulse-field-gradient experiments. A-B Overlay of 1D experiments measured with 5 % (blue) and 95 % (red) gradient strength with diffusion delays optimized for DSS (40 ms) and the NTE (200 ms). Black arrows indicate peaks that were used for analysis. C-D Fit of intensities for DSS signal (C) and a selected peak from amide region of the NTE (D).

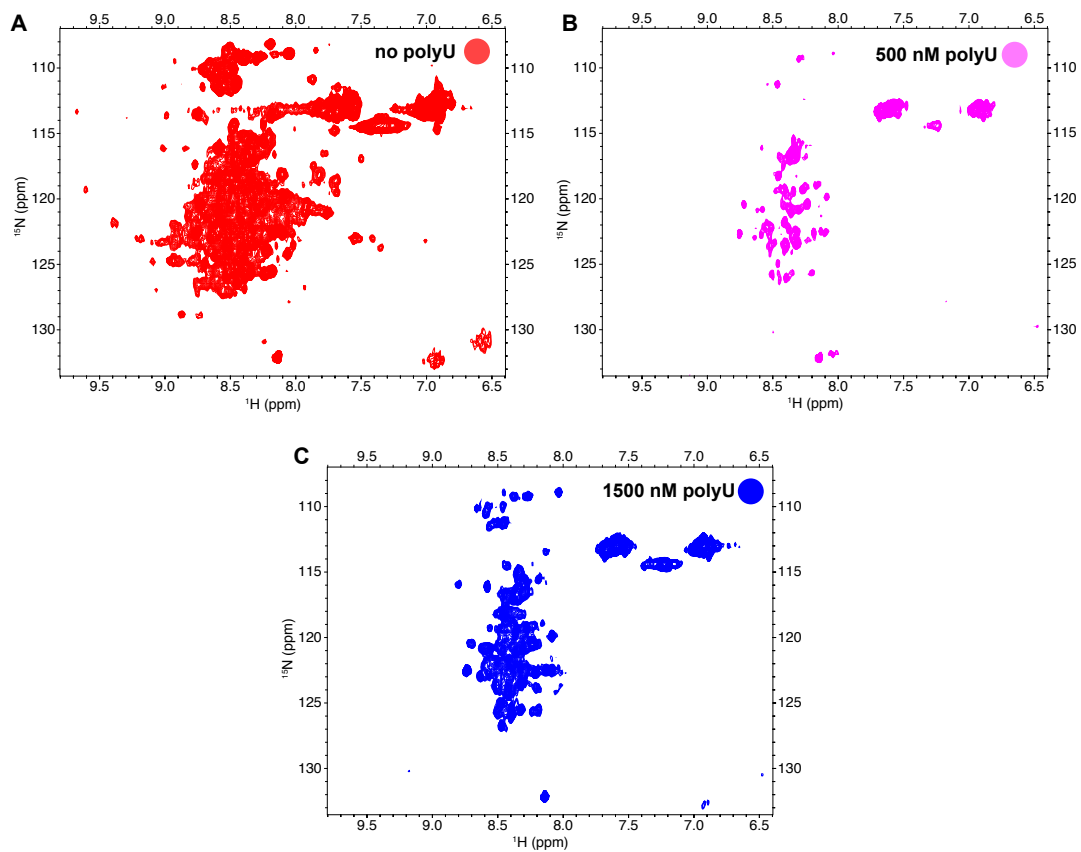

**Figure S5.** PolyU titration of  $\text{N}^{\text{SARS-CoV-2}}$ .  $^1\text{H}$ - $^{15}\text{N}$  HSQC spectra of the full-length  $\text{N}^{\text{SARS-CoV-2}}$  with 0 nM (A), 500 nM (B), and 1500 nM (C) concentration of polyU. All spectra were measured at 5 °C.

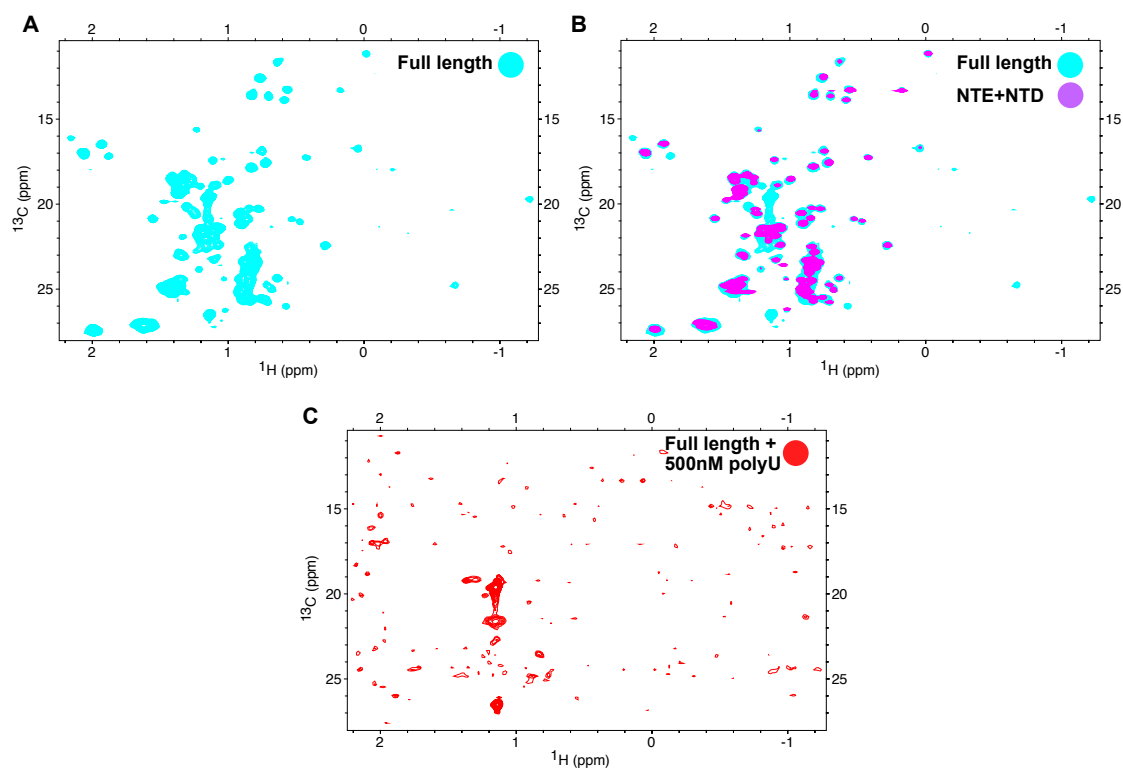

**Figure S6.**  $^{13}\text{C}$  natural abundance NMR XL-ALSOFAST  $^1\text{H}$  spectra of methyl region. A) Full-length  $\text{N}^{\text{SARS-CoV-2}}$ . B) Overlay of full-length  $\text{N}^{\text{SARS-CoV-2}}$  with a construct missing the dimerization domain and the C-terminal extension. C) Spectrum of full-length  $\text{N}^{\text{SARS-CoV-2}}$  upon addition of 500nM polyU. All spectra were measured at 25 °C on 800 MHz spectrometer.

1. Rößler P, Mathieu D, Gossert AD (2020) Enabling NMR Studies of High Molecular Weight Systems Without the Need for Deuteration: The XL-ALSOFAST Experiment with Delayed Decoupling. *Angewandte Chemie International Edition* 59:19329–19337.

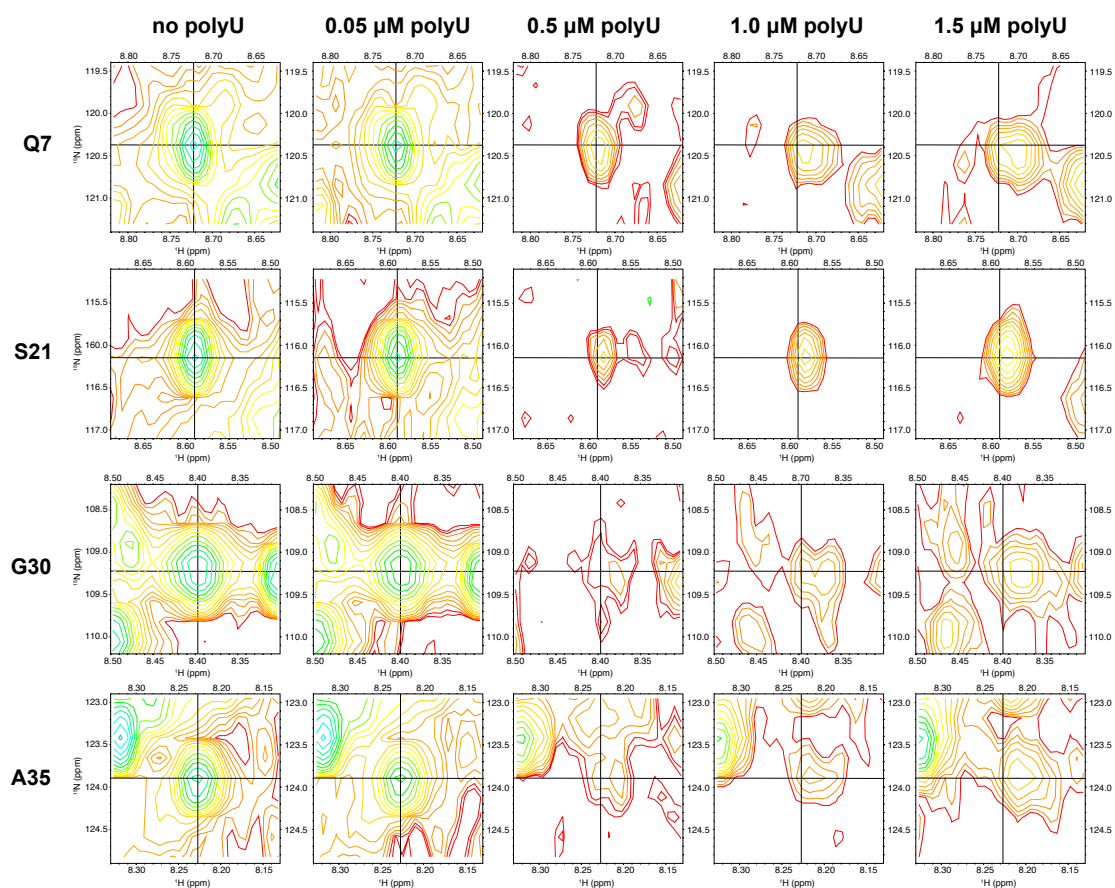

**Figure S7.** Titration of N<sup>SARS-CoV-2</sup> with polyU. <sup>1</sup>H-<sup>15</sup>N HSQC spectra of Q7, S21, G30, and A35 in the presence of 0, 0.05, 0.5, 1.0 and 1.5 μM polyU RNA. Spectra were measured at 5 °C at 700MHz.



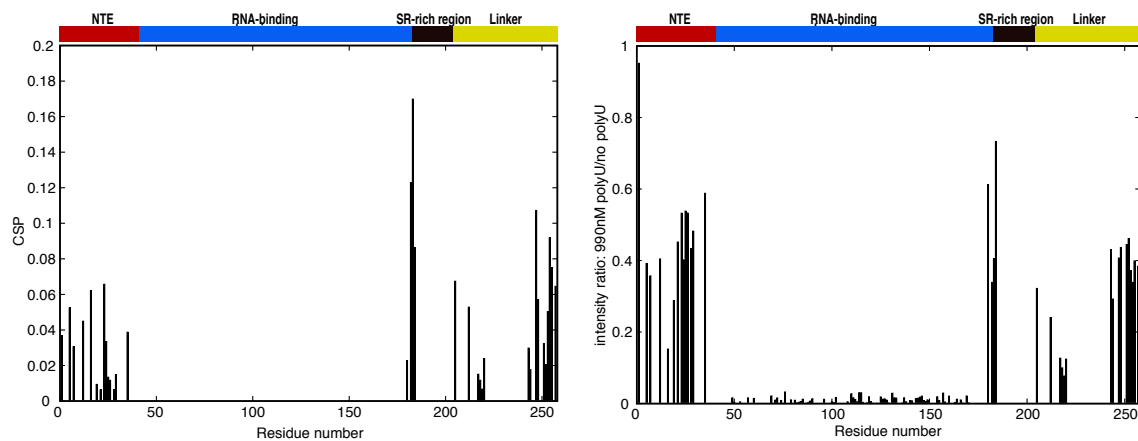

**Figure S8.** Titration of N(1-257) with polyU measured at 25 °C at 700 MHz. Chemical shift perturbation between protein without polyU and 990 nM polyU concentration (left). PolyU concentration was adjusted to compensate for protein charge change resulting from deletion of the C-terminal part. Intensity ratio between the spectra with 990 nM polyU and without polyU (right). RNA-binding domain signals are indicated with small bars estimated from spectral noise due to the fact that the signals were broadened beyond detection upon addition of polyU.
